# Supplementary material for: RNA-Seq analysis of nodule development at five different developmental stages of soybean (Glycine max) inoculated with Bradyrhizobium japonicum strain 113-2
Source: PubMed Central journal article supplement (PMC5294573; doi:10.1038/srep42248), 2017-02-07
Supplement: srep42248-s1.pdf [file srep42248-s1.pdf]

RNA-Seq analysis of nodule development at five different developmental stages of soybean (*Glycine max*) inoculated with *Bradyrhizobium japonicum* strain 113-2

Song L Yuan<sup>1,2</sup>, Rong Li<sup>1,2</sup>, Hai F Chen<sup>1,2</sup>, Chan J Zhang<sup>1,2</sup>, Li M Chen<sup>1,2</sup>, Qing N Hao<sup>1,2</sup>,

Shui L Chen<sup>1,2</sup>, Zhi H Shan<sup>1,2</sup>, Zhong L Yang<sup>1,2</sup>, Xiao J Zhang<sup>1,2</sup>, De Z Qiu<sup>1,2</sup> and Xin A

Zhou<sup>1,2\*</sup>

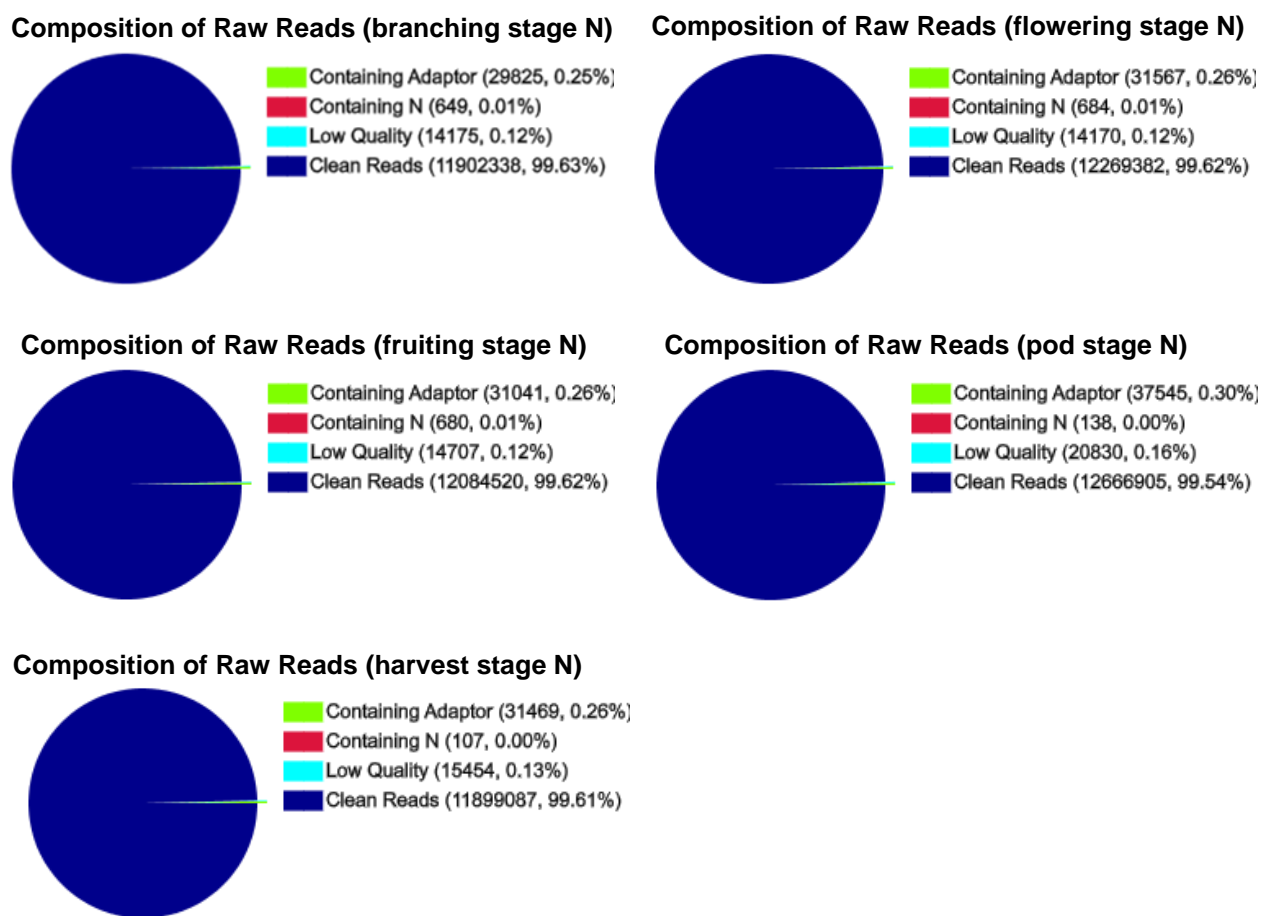

**Figure S1: Representative results of the classification of raw reads for nodules samples at five developmental periods.**

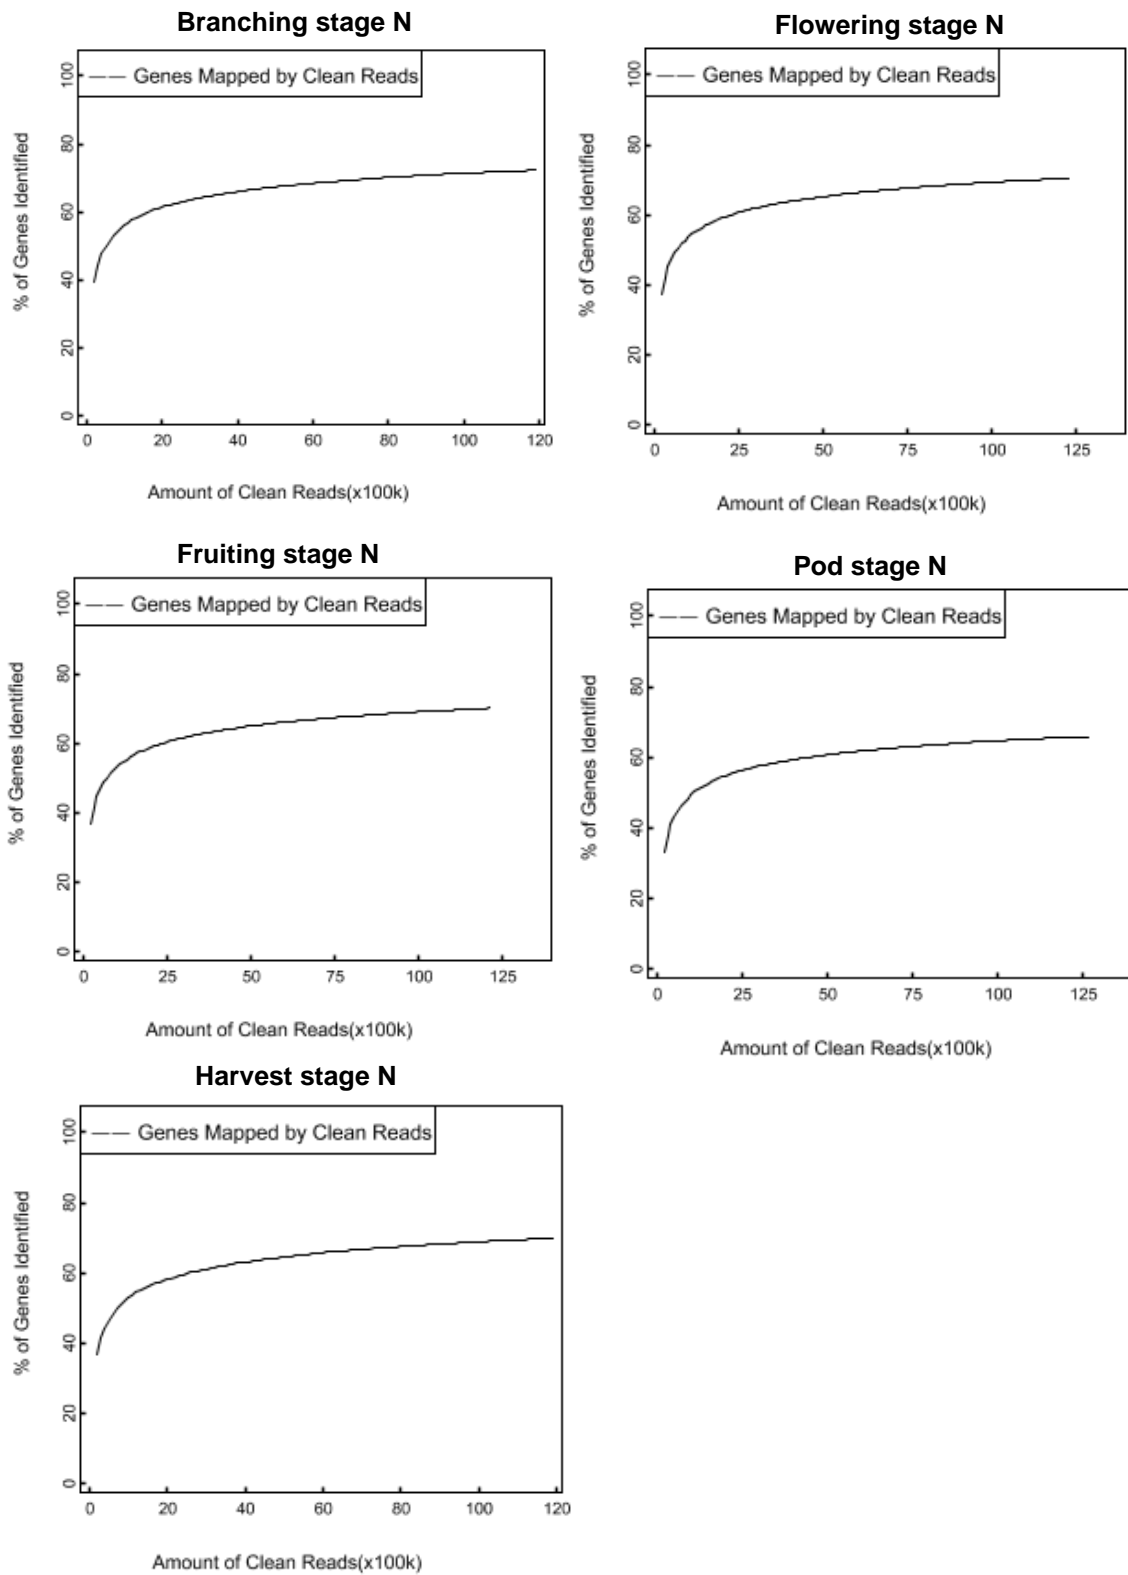

**Figure S2: Representative results of sequencing saturation analysis for nodules sampled at five developmental periods.**

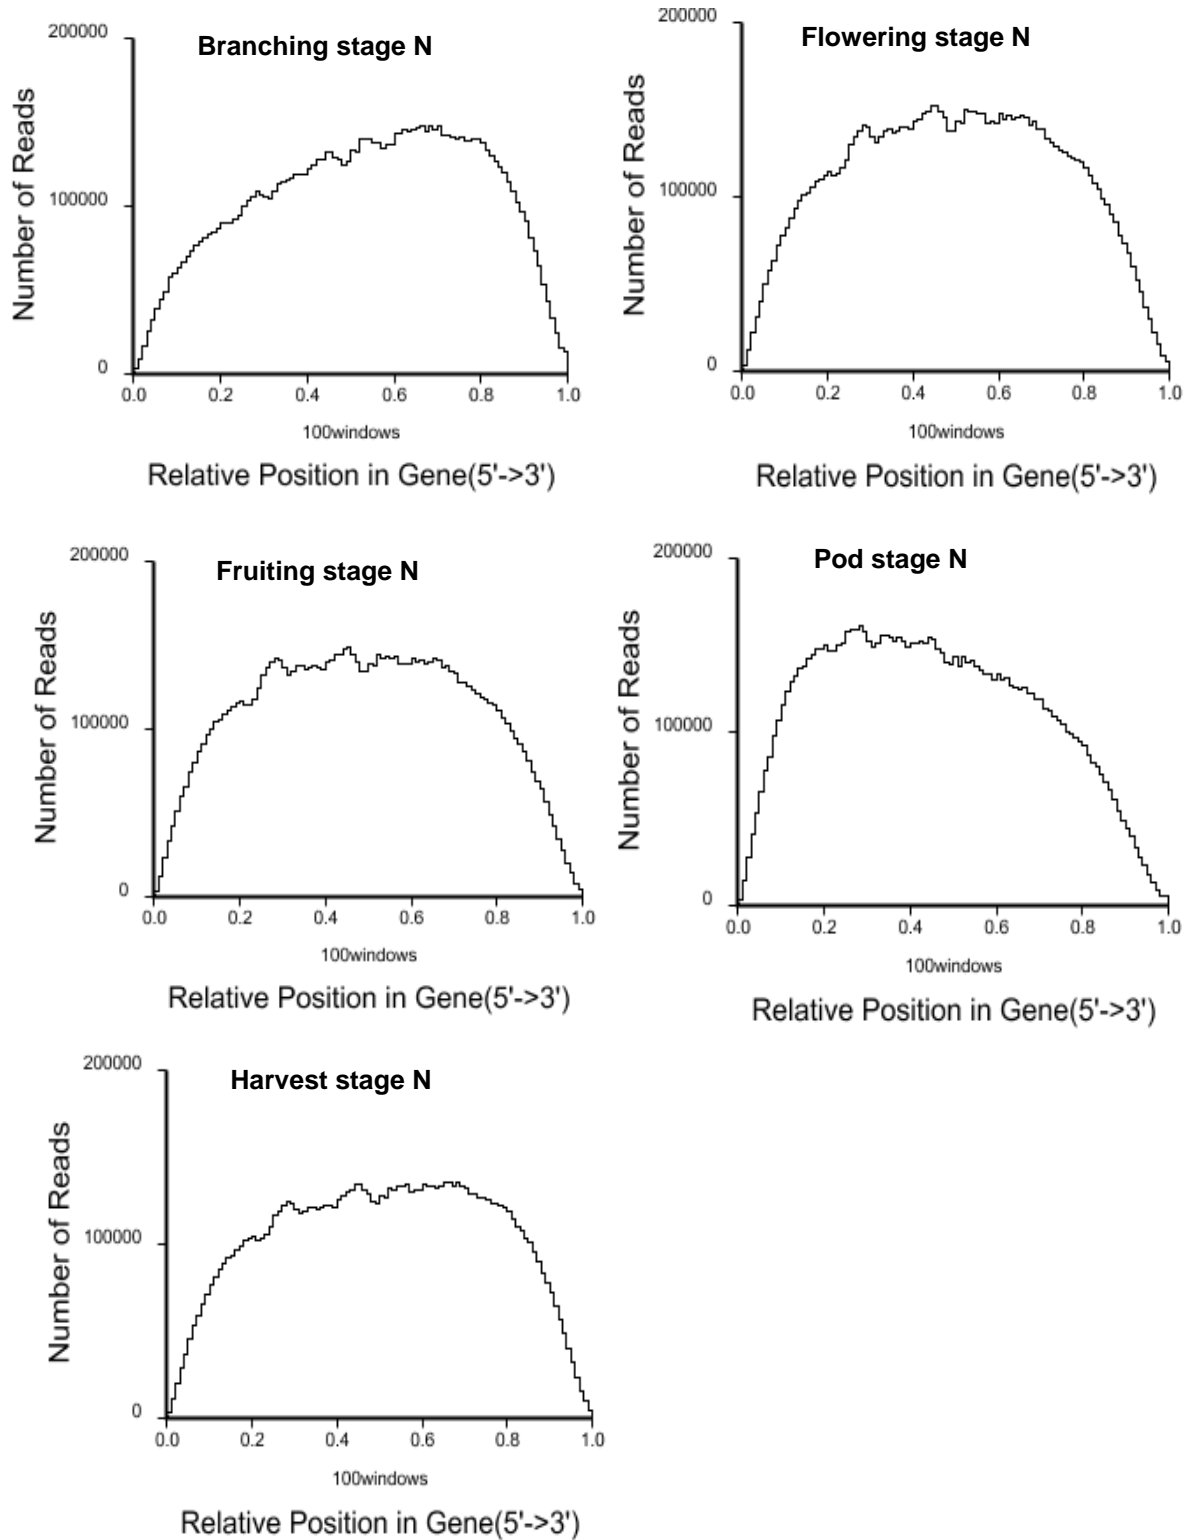

**Figure S3: Representative results of distributions of reads on reference genes for nodules sampled at five developmental periods.**

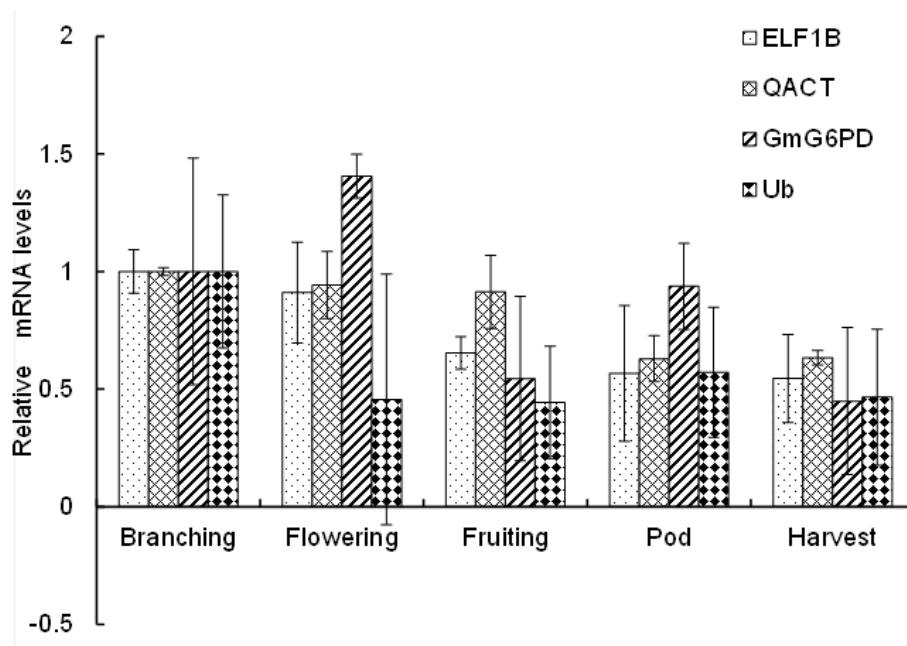

**Figure S4: The stability assay of four references genes at five developmental stages of soybean.**

**Table S1: Analysis of nodulation phenotypic in soybean inoculated with rhizobium strains113-2.**

|                               | mean value $\pm$ SE         |                           |
|-------------------------------|-----------------------------|---------------------------|
|                               | Number of nodules per plant | Dry Weight per nodule(mg) |
| Branching                     | 13.125 $\pm$ 1.548 (N=24)   | –                         |
| Flowering                     | 42.375 $\pm$ 1.908 (N=24)   | 1.366 $\pm$ 0.050         |
| Fruiting                      | 51.520 $\pm$ 5.337 (N=25)   | 2.133 $\pm$ 0.146         |
| Pod                           | 37.400 $\pm$ 1.830 (N=25)   | 1.071 $\pm$ 0.044         |
| harvest                       | 14.500 $\pm$ 1.558 (N=15)   | 1.697 $\pm$ 0.26          |
| P Value (Branching/Flowering) | 0.445987055                 | –                         |
| P Value (Branching/Fruiting)  | 0.921888575                 | –                         |
| P Value (Branching/Pod)       | 0.671463359                 | –                         |
| P Value (Branching/harvest)   | –                           | –                         |
| P Value (Flowering/Fruiting)  | 0.136749853                 | –                         |
| P Value (Flowering/Pod)       | 0.103619795                 | –                         |
| P Value (Flowering/harvest)   | –                           | –                         |
| P Value (Fruiting/Pod)        | 0.014539473                 | –                         |
| P Value (Fruiting/harvest)    | –                           | –                         |
| P Value (Pod/harvest)         | –                           | –                         |

**Table S2: Summary of the mapping result (mapping to reference genes and the genome).**

|                      | branching stage N | flowering stage N | fruiting stage N | pod stage N      | harvest stage N  |
|----------------------|-------------------|-------------------|------------------|------------------|------------------|
| Map to Gene          |                   |                   |                  |                  |                  |
| total mapped reads   | 10362371(87.06%)  | 10945168(89.21%)  | 10750603(88.96%) | 11050021(87.24%) | 10163957(85.42%) |
| perfect match reads  | 8894432(74.73%)   | 9371580(76.38%)   | 9140987(75.64%)  | 9296356(73.39%)  | 8646303(72.66%)  |
| unique match reads   | 8881615(74.62%)   | 9424020(76.81%)   | 9268099(76.69%)  | 9673766(76.37%)  | 8811312(74.05%)  |
| multi-position match | 1480756(12.44%)   | 1521148(12.4%)    | 1482504(12.27%)  | 1376255(10.86%)  | 1352645(11.37%)  |
| Map to Genome        |                   |                   |                  |                  |                  |
| total mapped reads   | 10183173(85.56%)  | 10490977(85.51%)  | 10287336(85.13%) | 10635747(83.96%) | 9718196(81.67%)  |
| perfect match reads  | 8531889(71.68%)   | 8736557(71.21%)   | 8498873(70.33%)  | 8706798(68.74%)  | 8031614(67.5%)   |
| unique match reads   | 8644266(72.63%)   | 8991605(73.28%)   | 8856144(73.29%)  | 9300692(73.43%)  | 8417920(70.74%)  |
| multi-position match | 1538907(12.93%)   | 1499372(12.22%)   | 1431192(11.84%)  | 1335055(10.54%)  | 1300276(10.93%)  |

**Table S4: Lists of DEGs with over 8-fold changes in the plant–pathogen interaction KEGG pathway.**

| Gene sets       | Gene          | Groups       |
|-----------------|---------------|--------------|
| <b>MKK1/2</b>   | Glyma15g18860 | Group 1,4    |
| <b>PR1</b>      | Glyma17g07350 | Group 1      |
|                 | Glyma13g32560 | Group 1      |
|                 | Glyma15g06830 | Group 5,8    |
| <b>CEBiP</b>    | Glyma06g11820 | Group 2,4    |
| <b>RPS5</b>     | Glyma15g02870 | Group 3      |
|                 | Glyma18g14810 | Group 3      |
|                 | Glyma08g16041 | Group 3,6    |
|                 | Glyma19g07680 | Group 3      |
|                 | Glyma18g51546 | Group 6,8,10 |
|                 | Glyma16g34030 | Group 6,8,10 |
|                 | Glyma15g39531 | Group 6,8    |
|                 | Glyma08g12560 | Group 10     |
| <b>PBS1</b>     | Glyma06g46971 | Group 5      |
| <b>WRKY2209</b> | Glyma19g40470 | Group 7,9    |
|                 | Glyma16g03570 | Group 7,9    |

|             |               |            |
|-------------|---------------|------------|
| <b>RIN4</b> | Glyma09g01151 | Group 7,10 |
| <b>EFR</b>  | Glyma07g17910 | Group 10   |
| <b>RPS2</b> | Glyma18g51546 | Group 10   |
|             | Glyma16g34030 | Group 10   |
|             | Glyma08g12560 | Group 10   |
|             | Glyma02g04750 | Group 10   |
|             | Glyma17g21200 | Group 10   |

**Table S5: Cysteine proteinases, cystatins and cysteine-rich proteins identified in nodule development and senescence using RNA-Seq.**

| cysteine-rich genes |                    |                     |               |                    |                 |
|---------------------|--------------------|---------------------|---------------|--------------------|-----------------|
| Gene                | Groups             | Annotation          | Gene          | Groups             | Annotation      |
| Glyma10g35100       | Group 3-4,6-9      | cysteine proteinase | Glyma09g40681 | Group 1-4,6,8      | protein kinases |
| Glyma12g04340       | Group 7,9          | cysteine proteinase | Glyma10g39910 | Group 4,10         | protein kinases |
| Glyma17g18440       | Group 1-3          | cysteine proteinase | Glyma11g32301 | Group 3,7,8,10     | protein kinases |
| Glyma11g12130       | Group 2-4,7        | cysteine proteinase | Glyma11g32500 | Group 3,6,8,10     | protein kinases |
| Glyma14g09440       | Group 3-4,6,8      | cysteine proteinase | Glyma13g25800 | Group 3,6,8,10     | protein kinases |
| Glyma17g35720       | Group 3-4,6-9      | cysteine proteinase | Glyma09g27782 | Group 1,2,4,6,8,10 | protein kinases |
| Glyma04g03020       | Group 3,10         | cysteine proteinase | Glyma20g27780 | Group 1,2,4,6,8,10 | protein kinases |
| Glyma15g19580       | Group 3,6          | cysteine proteinase | Glyma08g39150 | Group 4            | protein kinases |
| Glyma14g40670       | Group 1-7,10       | cysteine proteinase | Glyma07g24010 | Group 1,2,4,10     | protein kinases |
| Glyma09g08100       | Group 3-4,6-9      | cysteine proteinase | Glyma20g27460 | Group 1,2,4        | protein kinases |
| Glyma04g36470       | Group 1-4,6-9      | cysteine proteinase | Glyma18g20470 | Group 1,2,4        | protein kinases |
| Glyma06g18390       | Group 1,3-9        | cysteine proteinase | Glyma20g27720 | Group 2            | protein kinases |
| Glyma18g12240       | Group 1-2,4,6,8,10 | cystatin            | Glyma08g10030 | Group 3            | protein kinases |
| Glyma05g28250       | Group 1-2,4        | cystatin            | Glyma13g25811 | Group 1-4          | protein kinases |
| Glyma15g36180       | Group 3            | cystatin            | Glyma02g04210 | Group 1,2,4,8,10   | protein kinases |
| Glyma15g12211       | Group 2-4,6        | cystatin            | Glyma11g32520 | Group 3-7,9        | protein kinases |
| Glyma14g04250       | Group 1-5,7,10     | cystatin            | Glyma20g27580 | Group 4,7          | protein kinases |
| Glyma18g00690       | Group 1-5          | cystatin            | Glyma18g53186 | Group 1-5,7,9,10   | protein kinases |
| Glyma10g26900       | Group 1-5,7-10     | secretory protein   | Glyma18g45175 | Group 1-4          | protein kinases |
| Glyma13g01250       | Group 1-4,7,9,10   | secretory protein   | Glyma04g15456 | Group 1-4          | protein kinases |
| Glyma05g34990       | Group 1-5,7-8      | secretory protein   | Glyma11g31995 | Group 2-7,9,10     | protein kinases |
| Glyma18g04610       | Group 1-4,6-7,9-10 | secretory protein   | Glyma20g27660 | Group 1-4,7,9,10   | protein kinases |
| Glyma08g04730       | Group 2,4,5,8,10   | secretory protein   | Glyma20g27670 | Group 1-4,7,9,10   | protein kinases |
| Glyma20g34230       | Group 2,5          | secretory protein   | Glyma20g27690 | Group 1-4,7,9,10   | protein kinases |
| Glyma19g35130       | Group 2-5,7        | secretory protein   | Glyma20g27790 | Group 1-4          | protein kinases |
| Glyma14g39440       | Group 3,4,7,9,10   | secretory protein   | Glyma11g32600 | Group 2-10         | protein kinases |
| Glyma13g38170       | Group 2-7,9        | secretory protein   | Glyma01g45160 | Group 3-4,6-10     | protein kinases |
| Glyma14g14750       | Group 2-8,10       | polycomb protein    | Glyma11g32041 | Group 2-4,6-10     | protein kinases |
| Glyma17g31399       | Group 3,10         | polycomb protein    | Glyma10g39961 | Group 1,3-10       | protein kinases |
| Glyma10g39870       | Group 1-4,7,9,10   | protein kinases     | Glyma18g05260 | Group 1-9          | protein kinases |

**Table S6: Symbiotic nitrogen fixation - related genes identified in nodule development and senescence using RNA-Seq.**

| Symbiotic nitrogen fixation - related genes |                  |                        |                                    |
|---------------------------------------------|------------------|------------------------|------------------------------------|
| Gene                                        | Groups           | Annotation             | Potential symbiotic function       |
| Glyma01g03470                               | Group 1-5,7,8,10 | <i>Enod 40</i>         | Nodule development                 |
| Glyma10g23790                               | Group 3,6,8,10   | <i>Nodulin 35</i>      | Assimilation of the fixed nitrogen |
| Glyma16g04750                               | Group 1-4,7,9,10 | <i>ApyraseGS52</i>     | Nodulation                         |
| Glyma02g06680                               | Group 10         | <i>Calmodulin-like</i> | Nodulation                         |
| Glyma19g45310                               | Group 3,8,10     | <i>MtDMI1-like</i>     | Nodulation                         |
| Glyma09g33510                               | Group 3,6,8,10   | <i>MtDMI2-like</i>     | Nodulation                         |
| Glyma16g04410                               | Group 1-8,10     | <i>MtERN1-like</i>     | Nodulation                         |
| Glyma19g29000                               | Group 1-4,6,7    | <i>MtERN1-like</i>     | Nodulation                         |
| Glyma01g35255                               | Group 2-4,6,8,10 | <i>MtIPD3-like</i>     | Nodulation                         |
| Glyma09g34695                               | Group 3-4,6-8,10 | <i>MtIPD3-like</i>     | Nodulation                         |
| Glyma10g33851                               | Group 6,8,10     | <i>MtLIN-like</i>      | Nodulation                         |
| Glyma02g43860                               | Group 1-9        | <i>MtLYK3-like</i>     | Nodulation                         |
| Glyma02g43850                               | Group 1-6,9,10   | <i>MtLYK3-like</i>     | Nodulation                         |
| Glyma01g38550                               | Group 1-3,7,9-10 | <i>MtLYR3-like</i>     | Nitrate transporter                |
| Glyma04g00210                               | Group 3-4        | <i>MtNIN-like</i>      | Nodulation                         |
| Glyma07g04430                               | Group 4,7,9      | <i>MtNSP1-like</i>     | Nodulation                         |
| Glyma06g11610                               | Group 2,4,5,7-9  | <i>MtNSP2-like</i>     | Nodulation                         |
| Glyma10g07190                               | Group 1-8,10     | <i>MtRRP1-like</i>     | Nodulation                         |
| Glyma03g33850                               | Group 7          | <i>MtSKL1-like</i>     | Nodulation                         |
| Glyma12g04390                               | Group 1-6,10     | <i>MtSUNN-like</i>     | Regulates nodule number            |
| Glyma20g38950                               | Group 3,6,8      | <i>GmN56</i>           | Nitrogen fixation                  |
| Glyma13g12484                               | Group 6          | <i>GmN56</i>           | Nitrogen fixation                  |
| Glyma19g29880                               | Group 1-7,9,10   | <i>GmN56</i>           | Nitrogen fixation                  |
| Glyma05g08400                               | Group 1-4,7-9    | <i>GmENOD93</i>        | Nodule development                 |
| Glyma17g12610                               | Group 1,2,6,8,9  | <i>GmENOD93</i>        | Nodule development                 |

**Table S7: Primers for genes selected for semi-quantitative RT-PCR and qPCR**

**analysis**

| Gene                       | Forward primer                 | Reverse primer             |
|----------------------------|--------------------------------|----------------------------|
| <i>Ubiquitin</i> (soybean) | 5'-GCTCGTTGTGTAATGTTGG-3'      | 5'-CGTAGGTGGGATATTAGAGT-3' |
| <i>QACT</i> (soybean)      | 5'-ATCTTGACTGAGCGTGGTTATTCC-3' | 5'-GCTGGTCCTGGCTGTCTCC-3'  |
| <i>ELF1B</i> (soybean)     | 5'-GTTGAAAAGCCAGGGGACA-3'      | 5'-TCTTACCCCTTGAGCGTGG-3'  |

|                                |                                 |                                    |
|--------------------------------|---------------------------------|------------------------------------|
| <i>Gmg6po</i> (soybean)        | 5'-ACTCCTTGATACCGTTGTCCAT-3'    | 5'-GTTTGTATCCGCCTACAGCCT-3'        |
| <i>Glyma06g11730</i>           | 5'-GTCACGTGTGAACTACCAGGA-3'     | 5'-AGCTATATGGCCTAATCTCTGGA-3'      |
| <i>Glyma20g34140</i>           | 5'-ACGGCTTGATAAGGCTCCAAA-3'     | 5'-AGGGTTACACAATAACTCGCC -3'       |
| <i>Glyma06g18390</i>           | 5'-TCTCAGATTCAATGCCAGTGT-3'     | 5'-TGAAACTCTTGCCATAGAAAGG-3'       |
| <i>Glyma05g26800</i>           | 5'-TGTGAATCCCCCTTCTTCAGC-3'     | 5'-GACAACACAAGTTCTGCAGTT-3'        |
| <i>Glyma14g07870</i>           | 5'-GCCTCACTGGTATGTGACTGT-3'     | 5'-TGGACGTGAACAAAGAAGAGGT-3'       |
| <i>Glyma15g13290</i>           | 5'-TTATTCACGCAAGCTGGGTTC-3'     | 5'-GGAGGTCAAATAAACAAAGGAGC-3'      |
| <i>Glyma03g29670</i>           | 5'-ACTGTGGCATGTGGAGGAAC-3'      | 5'-TGTCAAACCACTTTTCATGGCTC-3'      |
| <i>Glyma08g06690</i>           | 5'-TGGTCCTTTTCTTTCAGCACCT-3'    | 5'-CAGCCAAAATAGCGAGGGA-3'          |
| <i>Glyma10g34280 (Lb)</i>      | 5'-ACAATAAAGGAAGCTGTTGGCGG-3'   | 5'-TTACACTTTACGGCAATGCAG-3'        |
| <i>NIN (L.japonicus)</i>       | 5'-AACTCACTGGAAACAGGTGCTTTC-3'  | 5'-CTATTGCGGAATGTATTAGCTAGA-3'     |
| <i>Enod40 (L.japonicus)</i>    | 5'-CAAACTCGTTATGTTGCGG-3'       | 5'-CACCTC AAAGGA AGAAGA ACA-3'     |
| <i>Lb (L.japonicus)</i>        | 5'-CTCCAAGCCCATGCTGAAAA-3'      | 5'-TGGCATCTGCAAGTGTCACTTC-3'       |
| <i>Ubiquitin (L.japonicus)</i> | 5'-TTCACCTTGCTCCGTCTTC-3'       | 5'-AACCAACCAGCACACACAGACAATC-3'    |
| <i>Glyma18g12240</i>           | 5'-GGTACCATGGCAATGATAGGAGGC -3' | 5'-GGATCCTTAGCTGGGTGCAGCATAAG - 3' |

---
